# Supplementary material for: Azido-Ceramides, a Tool to Analyse SARS-CoV-2 Replication and Inhibition—SARS-CoV-2 Is Inhibited by Ceramides
Source: MDPI journal article supplement (doi:10.3390/ijms24087281), 2023-04-14
Supplement: s1 [file s1]

## Supporting information

# Azido-Ceramides, a Tool to Analyse SARS-CoV-2 Replication and Inhibition – SARS-CoV-2 Is Inhibited by Ceramides

Daniela Brenner <sup>1,†</sup>, Nina Geiger <sup>2,‡</sup>, Jan Schlegel <sup>3,‡</sup>, Viktoria Diesendorf <sup>2</sup>, Louise Kersting <sup>1</sup>, Julian Fink <sup>1</sup>, Linda Stelz <sup>3</sup>, Sibylle Schneider-Schaulies <sup>2</sup>, Markus Sauer <sup>3</sup>, Jochen Bodem <sup>2,\*</sup> and Jürgen Seibel <sup>1,\*</sup>

<sup>1</sup> Institute of Organic Chemistry, Julius-Maximilians-Universität Würzburg, 97074 Würzburg, Germany; daniela.brenner@uni-wuerzburg.de (D.B.); louise.kersting@uni-wuerzburg.de (L.K.)

<sup>2</sup> Institute of Virology and Immunobiology, Julius-Maximilians-Universität Würzburg, 97078 Würzburg, Germany; nina.geiger@stud-mail.uni-wuerzburg.de (N.G.); viktoriaschneider@stud-mail.uni-wuerzburg.de (V.D.)

<sup>3</sup> Department of Biotechnology and Biophysics, Julius-Maximilians-Universität Würzburg, 97074 Würzburg, Germany; jan.schlegel@scilifelab.se (J.S.); m.sauer@uni-wuerzburg.de (M.S.)

\* Correspondence: jochen.bodem@uni-wuerzburg.de (J.B.); seibel@chemie.uni-wuerzburg.de (J.S.)

† These authors contributed equally to this work.

‡ Current Address: Department of Women's and Children's Health, Karolinska Institute, SciLifeLab, Tomtebodavägen 23B, Solna, 171 65 Stockholm, Sweden

## 1. Oligonucleotide sequences for FISH labelling

|                                                              |
|--------------------------------------------------------------|
| CGCCTAAGTCAAATGACTTTAGATCGGCGCTTACACTCGGACCTCGTCGACATGCATT   |
| GGTCCACCAAACGTAATGCGGGGTGCATTACACTCGGACCTCGTCGACATGCATT      |
| ATCTTGAAGTTTTCCAAGTGCACCTTGCTGTGTTACACTCGGACCTCGTCGACATGCATT |
| TAACATGACCATGAGGTGCAGTTCGAGCATTTACACTCGGACCTCGTCGACATGCATT   |
| TGTGATCAACCTATCAATTTGCACTTCAGCTTACACTCGGACCTCGTCGACATGCATT   |
| GTTGTTTTGATCGCGCCCCACTGCGTTTACACTCGGACCTCGTCGACATGCATT       |
| TTGAACTGTTGCGACTACGTGATGAGGAACGATTACACTCGGACCTCGTCGACATGCATT |
| AAGTGTCTCACCCTACGACCGTACTGAATTACACTCGGACCTCGTCGACATGCATT     |
| CGCCTTGTCTCGAGGGAATTTAAGGTCTTTTACACTCGGACCTCGTCGACATGCATT    |
| AACGCTGAAGCGCTGGGGGCAAATTGTGTTACACTCGGACCTCGTCGACATGCATT     |
| CCGTTAAGCTCACGCATGAGTTCACGGTTACACTCGGACCTCGTCGACATGCATT      |
| TTTGTTCTGGACCACGTCTGCCGAAAGCTTACACTCGGACCTCGTCGACATGCATT     |
| GTCTTCATAGAACGAACAACGCACTACAAGACTTACACTCGGACCTCGTCGACATGCATT |
| AAATCTGAAGGAGTAGCATCCTTGATTTACCTTACACTCGGACCTCGTCGACATGCATT  |
| AGTTCTTTTCTTGTGCAGGGACATAAGTCACATTACACTCGGACCTCGTCGACATGCATT |
| TAGCACGTGGAACCAATAGGCACACTTTTACACTCGGACCTCGTCGACATGCATT      |
| GCATTTTGGGGTAAGTAACCACAAGTAGTGCTTACACTCGGACCTCGTCGACATGCATT  |
| TGAGTTGGTAGTCCCAAAATCTTTGAGGCTACTTACACTCGGACCTCGTCGACATGCATT |
| GACATTTGTGCGAACAGTATCTACACAACTCTTACACTCGGACCTCGTCGACATGCATT  |
| ATTGTTTGATGAAGCCAGCATCTGCAAGTGTTTACACTCGGACCTCGTCGACATGCATT  |
| AACGTTCCGTGTACCAAGCAATTTTCATGCTTTACACTCGGACCTCGTCGACATGCATT  |

|                                                               |
|---------------------------------------------------------------|
| AGTTGTTATCGACATAGCGAGTGTATGCCCTTACACTCGGACCTCGTCGACATGCATT    |
| GGTCCAACCAGAAGTGATTGTACCCGCTTTACACTCGGACCTCGTCGACATGCATT      |
| TAGGCGTGACAAGTTTCATTATGATCTTGCAAGTTACACTCGGACCTCGTCGACATGCATT |
| GACTGTAAACTACATTCTTGGTGAAATGCAGCTTACACTCGGACCTCGTCGACATGCATT  |
| TGTTACCGGCAGCAGTATACACCCCTTTACACTCGGACCTCGTCGACATGCATT        |
| GCTTGTAAGGTTGCCCTGTTGTCCAGCTTACACTCGGACCTCGTCGACATGCATT       |
| ATTTCCCTTTGCACAGGTGACAATTTGTCCACTTACACTCGGACCTCGTCGACATGCATT  |
| GTTTTCAAGCCAGATTCATTATGGTATTCGGCTTACACTCGGACCTCGTCGACATGCATT  |
| CCCTTTGAGTGCGTGACAAATGTTTCACCTTTACACTCGGACCTCGTCGACATGCATT    |
| TCGATGTACTGAATGGGTGATTTAGAACCAGCTTACACTCGGACCTCGTCGACATGCATT  |
| GGAGAGTGCTAGTTGCCATCTCTTTTTGAGGTTACACTCGGACCTCGTCGACATGCATT   |
| TGGGTATGTCACACTCATATGAGTTGTTGACATTACACTCGGACCTCGTCGACATGCATT  |
| TATTGTTATAGCGGCCTTCTGTAAACACGCTTACACTCGGACCTCGTCGACATGCATT    |
| AAACAGTGCCAAAGATGTTAGTTAGCCACTGCTTACACTCGGACCTCGTCGACATGCATT  |
| CAGCATCAGTAGTGTCAGCAATGTCTCTGTTACACTCGGACCTCGTCGACATGCATT     |
| CAAAGGCAATAGTGCGACCACCCTTACGATTACACTCGGACCTCGTCGACATGCATT     |
| CTTGGTCATAGACACTGGTAGAATTTCTGTGGTTACACTCGGACCTCGTCGACATGCATT  |
| AGTCAACTGAACAACACCACCTGTAATGTAGTTACACTCGGACCTCGTCGACATGCATT   |
| CTGATAACTAGCGCATATACCTGCACCTTACACTCGGACCTCGTCGACATGCATT       |
| ATGTCAAGAATCTCAAGTGTCTGTGGATCACGTTACACTCGGACCTCGTCGACATGCATT  |
| AAAGGCACATTTGGTTGCATTCATTTGGTGACTTACACTCGGACCTCGTCGACATGCATT  |
| CCAATGTACACATAGTGCTTAGCACGTAATCTTACACTCGGACCTCGTCGACATGCATT   |
| CATCCACGCACAATTCAATTAAGGTGCTGATTACACTCGGACCTCGTCGACATGCATT    |
| ACAGCAACCTGGTTAGAAGTATTTGTTCCCTGGTTACACTCGGACCTCGTCGACATGCATT |
| GTGACAAGCTACAACACGTTGTATGTTTGCGATTACACTCGGACCTCGTCGACATGCATT  |
| AAATTGTGAGTAACAACCAGTGGTGTGTACCCTTACACTCGGACCTCGTCGACATGCATT  |
| TTGTAGCTTGTTTACCACACGTACAAGGTATCTTACACTCGGACCTCGTCGACATGCATT  |
| ACAACAGCAAGTTGCAAACAAAGTGAACACCCTTACACTCGGACCTCGTCGACATGCATT  |
| TACTATGGCAATCAAGCCAGCTATAAAACCTTACACTCGGACCTCGTCGACATGCATT    |
| GAAGTGAATAGGACACGGGTCATCAACTACATTTACACTCGGACCTCGTCGACATGCATT  |
| AGTTCCATCTCTAATTGAGGTTGAACCTCAACTTACACTCGGACCTCGTCGACATGCATT  |
| GGTGCTGACATCATAACAAAAGGTGACTCCTTACACTCGGACCTCGTCGACATGCATT    |
| TATCTAGTAATAGATTACCAGAAGCAGCGTGCTTACACTCGGACCTCGTCGACATGCATT  |
| TAGTTTCTGGATTGAATGACCACATGGAACGCTTACACTCGGACCTCGTCGACATGCATT  |
| ACGTGCCCCGCCGAGGAGAATTAGTCTGTTACACTCGGACCTCGTCGACATGCATT      |
| GTTCTTTTCACTGCACCTTTGGAAAGTAACACCTTACACTCGGACCTCGTCGACATGCATT |
| TCCCATTTTTTCACTGATAAACCACCAATCTGGTTACACTCGGACCTCGTCGACATGCATT |
| AGTAGGTATAACCACAGCAGTTAAAACACCCTTTACACTCGGACCTCGTCGACATGCATT  |
| TATGCAAAGTATGCCTACTTTTGCTCTGGTTTACACTCGGACCTCGTCGACATGCATT    |
| GTTAACATTTGGGCCGACAACATGAAGACAGTTTACACTCGGACCTCGTCGACATGCATT  |
| CCAGCAATACGAAGATGTCCACGAAGGATCATTACACTCGGACCTCGTCGACATGCATT   |
| AGTAAGCAACTGAATTTTCTGCACCAAGTGACTTACACTCGGACCTCGTCGACATGCATT  |
| ACTGTAATAGTTGTGTCCGTACCAGCTGCTTACACTCGGACCTCGTCGACATGCATT     |
| TATCACCAACATCAGACACTAATGCCTGATTACACTCGGACCTCGTCGACATGCATT     |
| AGTGTAGGCAATGATGGATTGACTAGCTACATTACACTCGGACCTCGTCGACATGCATT   |
| GTCATGTTTCAGAAATAGGACTTGTTGTGCCATTTACACTCGGACCTCGTCGACATGCATT |

|                                                               |
|---------------------------------------------------------------|
| ATGTGATGTTGATATGACATGGTCGTAACAGCTTACACTCGGACCTCGTCGACATGCATT  |
| GTTGAGTTTGAAGGCATCTATGCTATTCTTGGTTACACTCGGACCTCGTCGACATGCATT  |
| CACATGTCTTGGACAGTAACTACGTCATCAATTACACTCGGACCTCGTCGACATGCATT   |
| GTCCTCTGACTTCAGTACATCAAACGAATTTGTTACACTCGGACCTCGTCGACATGCATT  |
| TGAACAACATCACCCACTATATATGGAGCATTACACTCGGACCTCGTCGACATGCATT    |
| CTTATTTAAGGCTCCTGCAACACCTCCTTACACTCGGACCTCGTCGACATGCATT       |
| CACAGGCGAACTCATTTACTTCTGTACCGATTACACTCGGACCTCGTCGACATGCATT    |
| AACGGTCAAAGAGTTTTAACCTCTCTTCCGTGTTACACTCGGACCTCGTCGACATGCATT  |
| GTGTTGAACCTTTCTACAAGCCGCATTAATCTTACACTCGGACCTCGTCGACATGCATT   |
| ACCAAGGTCACGGGGTGTCATGTTTTCAACTTACACTCGGACCTCGTCGACATGCATT    |
| CGCAGGCAAGATTATCCATTCCCTGCTTACACTCGGACCTCGTCGACATGCATT        |
| ATTTGACAGCAGAATTGGCCCTTAAAGCTGTTTACACTCGGACCTCGTCGACATGCATT   |
| TCCAGTTGGTAATTCCATATGGTGCATGTAACCTTACACTCGGACCTCGTCGACATGCATT |
| GGCAGTACAGACAACACGATGCACCACTTACACTCGGACCTCGTCGACATGCATT       |
| CCCACITTAAGTGGTCCATTAGTAGCTATGTATTACACTCGGACCTCGTCGACATGCATT  |
| ACAAAGCACTCGTGGACAGCTAGACACCTTACACTCGGACCTCGTCGACATGCATT      |
| AACGTGTGTCAGGGCGTAAACTTTTCATAAGCATTACACTCGGACCTCGTCGACATGCATT |
| AACTGTTATTGCCTGACCAGTACCAGTGTTTACACTCGGACCTCGTCGACATGCATT     |
| GTTGTACCACAAGTTACTTGTACCATAACAACCTTACACTCGGACCTCGTCGACATGCATT |
| GCTTTAGGGTTACCAATGTCGTGAAGAACTGGTTACACTCGGACCTCGTCGACATGCATT  |
| ACACTCAAGAACGTCTTTCTGTATGGTAGGATTTACACTCGGACCTCGTCGACATGCATT  |
| GAAGCCAATCCATGCACGTACATGTCTTATTACACTCGGACCTCGTCGACATGCATT     |
| AGGAATGAACCCTTAATAGTGAAATTGGGCCTTTACACTCGGACCTCGTCGACATGCATT  |
| TGTCATTAGTATAACTACCACCACGCTGGTTACACTCGGACCTCGTCGACATGCATT     |
| AAGTCACCATTAGTTGTGCGTAATATCGTGCCTTACACTCGGACCTCGTCGACATGCATT  |
| AAGATGGATGGAACCATTCTTCACTGTAACACTTACACTCGGACCTCGTCGACATGCATT  |
| TAAAGCTCACAAGTAGCGAGTGTTATCAGTGCTTACACTCGGACCTCGTCGACATGCATT  |
| ACCTCCAAGAGCTAGCTTTTGTGTATAAACCTTACACTCGGACCTCGTCGACATGCATT   |
| CCTCTACAGTGTAACCATTAAACCCTGACTTACACTCGGACCTCGTCGACATGCATT     |

## 2. Synthesis:

***tert*-Butyl ((*S*)-6-azido-1-(((2*S*,3*R*)-1,3-dihydroxy-(*E*)-octadec-4-ene-2-yl)amino)-1-oxohexane-2-yl)carbamate **1****

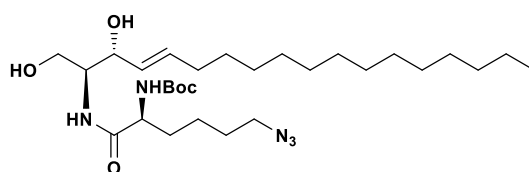

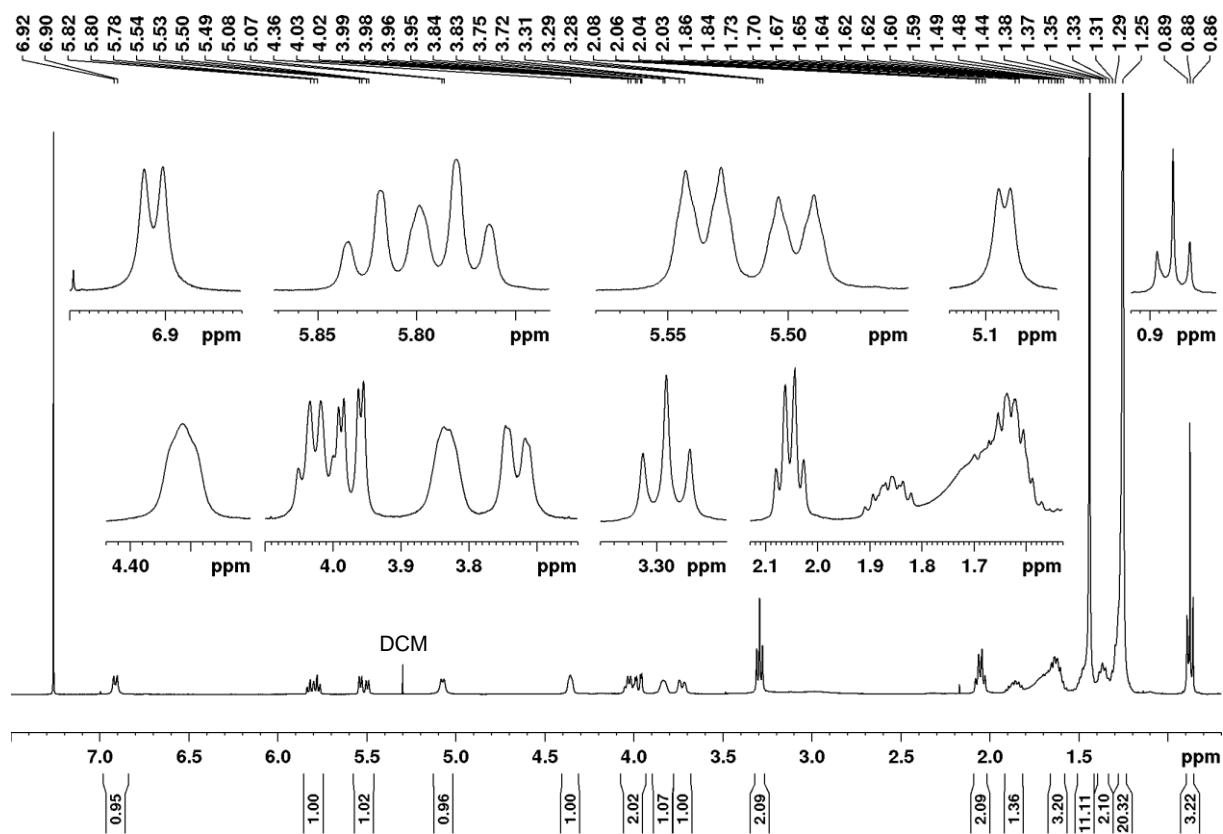

**Figure S1:**  $^1\text{H}$  NMR spectrum of 1 (400 MHz,  $\text{CDCl}_3$ ).

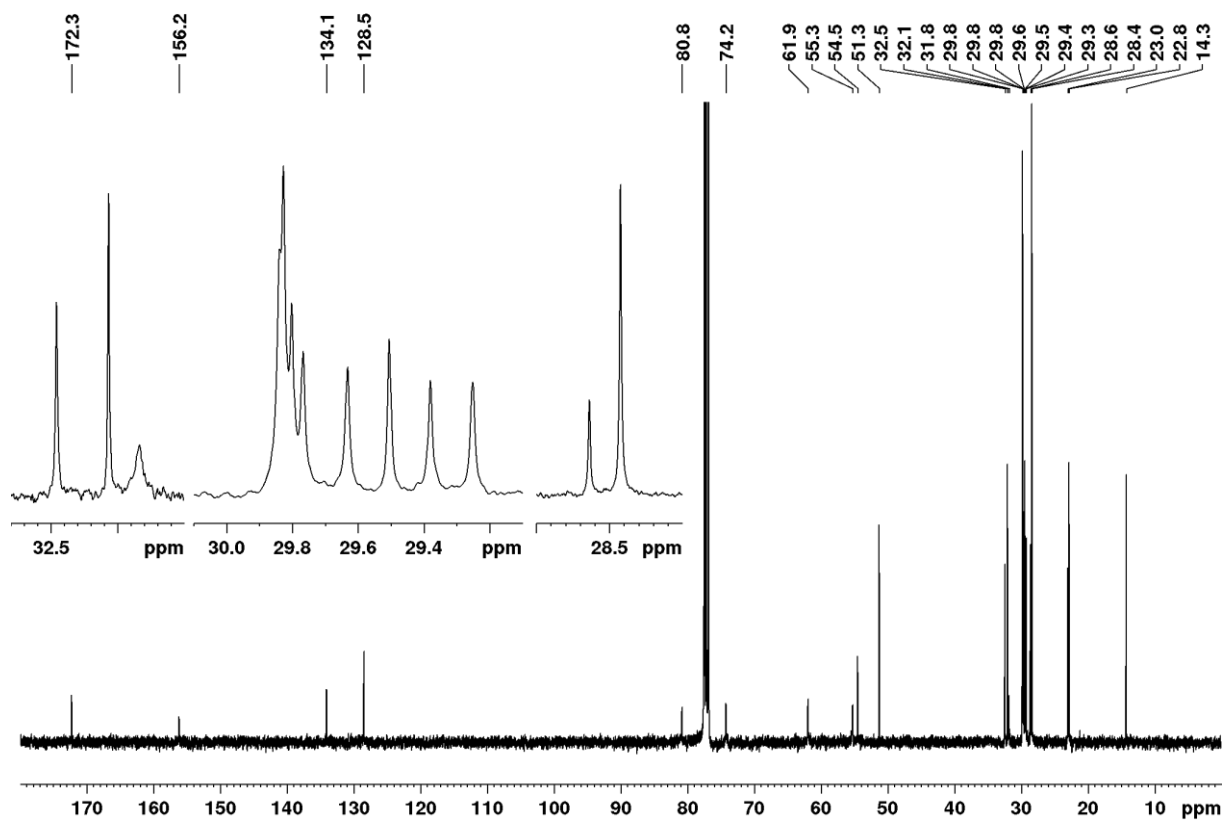

**Figure S2:**  $^{13}\text{C}$  NMR spectrum of 1 (100 MHz,  $\text{CDCl}_3$ ).

**(S)-2-Amino-6-azido-N-((2S,3R)-1,3-dihydroxy-(E)-octadec-4-ene-2-yl)hexanamide 2**

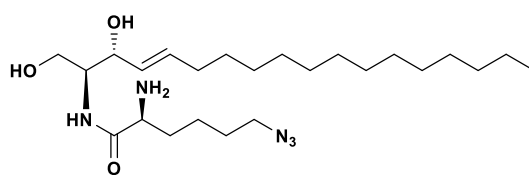

**2**

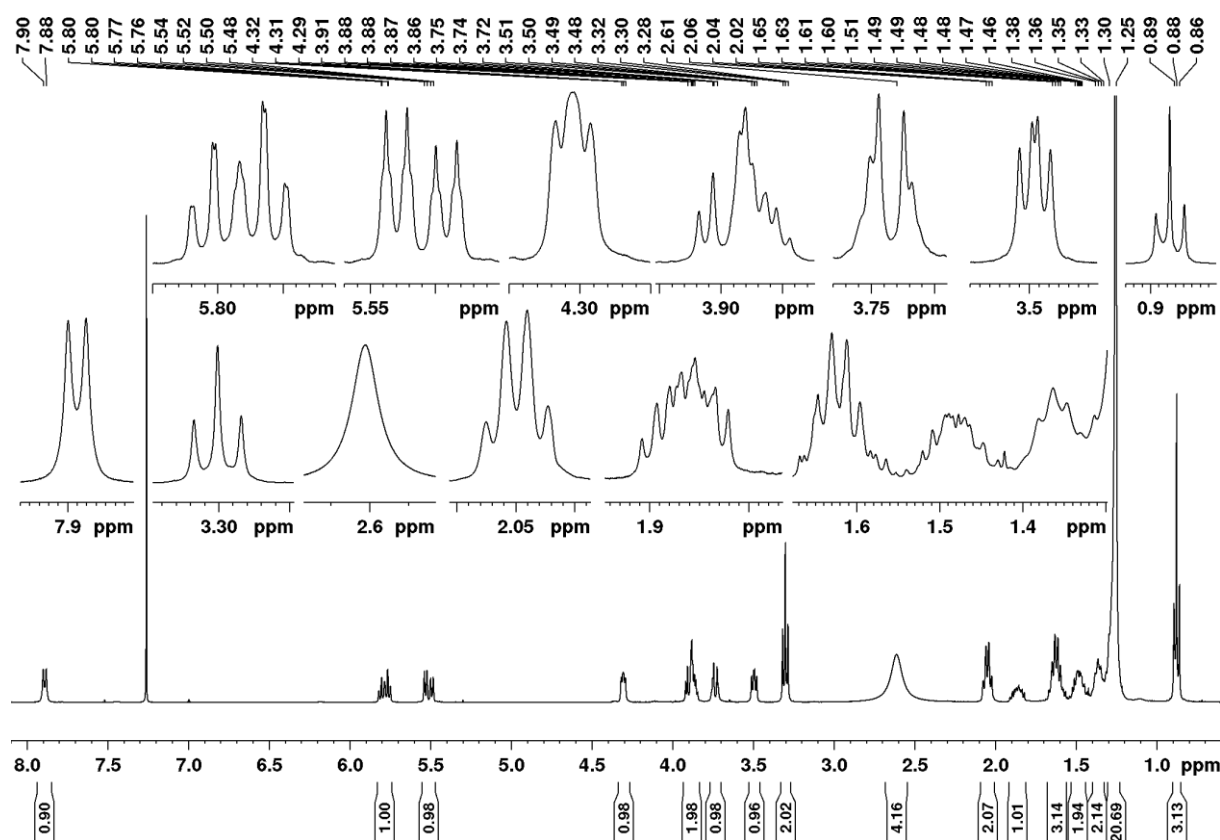

**Figure S3:**  $^1\text{H}$  NMR spectrum of **2** (400 MHz,  $\text{CDCl}_3$ ).

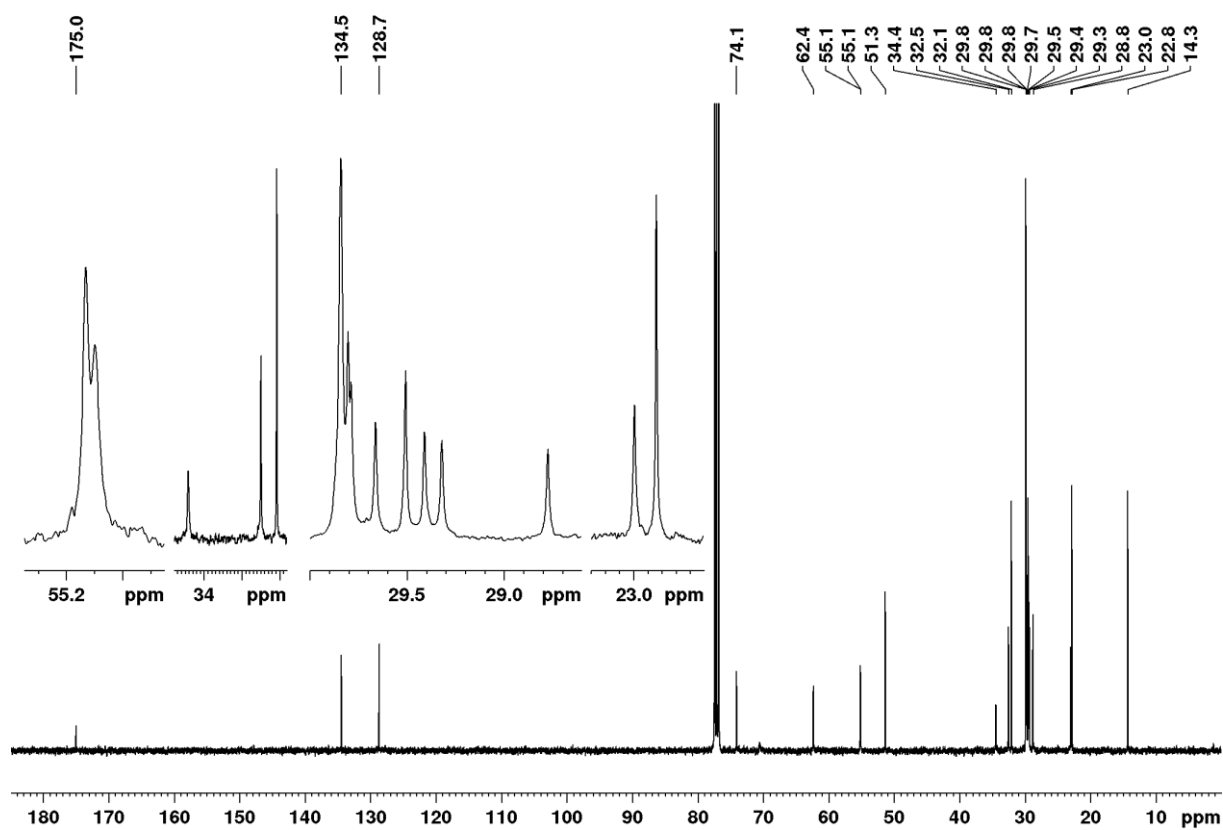

Figure S4:  $^{13}\text{C}$  NMR spectrum of 2 (100 MHz,  $\text{CDCl}_3$ ).
